# Supplementary material
Source: ML conference proceedings conference paper supplement (https://proceedings.mlr.press/v139/wang21x.html)
Supplement: Supplementary file 1 [file wang21x-supp.pdf]

---

## Supplemental Document for ‘‘Matrix Completion with Model-free Weighting’’

---

Jiayi Wang<sup>1</sup> Raymond K. W. Wong<sup>1</sup> Xiaojun Mao<sup>2</sup> Kwun Chuen Gary Chan<sup>3</sup>

### A. Proof of Lemma 1

*Proof of Lemma 1.* We first list two properties of max norm as follows. (i) As shown in Srebro & Shraibman (2005),  $\|\mathbf{B}\|_* \leq \sqrt{n_1 n_2} \|\mathbf{B}\|_{\max}$ . (ii) By an equivalent definition of max norm due to Lee et al. (2008) (also see equation (8) in Jalali & Srebro (2012)), we have  $\|\mathbf{C} \circ \mathbf{B}\| \leq \|\mathbf{C}\| \|\mathbf{B}\|_{\max}$ . Together with the duality of nuclear norm, we can show that

$$\begin{aligned} |\langle \mathbf{C} \circ \mathbf{B}, \mathbf{B} \rangle| &\leq \|\mathbf{C} \circ \mathbf{B}\| \|\mathbf{B}\|_* \leq \|\mathbf{C}\| \|\mathbf{B}\|_{\max} \|\mathbf{B}\|_* \\ &\leq \sqrt{n_1 n_2} \|\mathbf{C}\| \|\mathbf{B}\|_{\max}^2. \end{aligned} \quad (\text{S1})$$

□

### B. Proofs of Theorems 1, 2 and 3

Let  $\mathbf{e}_i(n) \in \mathbb{R}^n$  be the canonical basis vector, i.e., the  $i$ -th element of  $\mathbf{e}_i(n)$  is 1 and the remaining elements are 0. We can define similar standard basis elements for  $n_1$ -by- $n_2$  matrices:  $\mathbf{J}_{ij} = \mathbf{e}_i(n_1) \mathbf{e}_j^T(n_2)$ , which will be used in the applications of matrix Bernstein inequality in our proofs. For any  $\beta \geq 0$ , define the class of matrices  $\mathcal{B}_{\max}(\beta)$  to be the max-norm ball with radius  $\beta$ , i.e.,

$$\mathcal{B}_{\max}(\beta) = \{\mathbf{A} \in \mathbb{R}^{n_1 \times n_2} : \|\mathbf{A}\|_{\max} \leq \beta\}.$$

We also define

$$\mathcal{F} = \{\mathbf{u}\mathbf{v}^T : \mathbf{u} \in \{-1, +1\}^{n_1}, \mathbf{v} \in \{-1, +1\}^{n_2}\},$$

the set of rank-one sign matrices. Denote by  $K_G \in (1.67, 1.79)$  the Grothendieck’s constant. From Srebro & Shraibman (2005),

$$\text{conv}\mathcal{F} \subseteq \mathcal{B}_{\max}(1) \subseteq K_G \text{conv}\mathcal{F}. \quad (\text{S2})$$

Moreover, the cardinality of  $\mathcal{F}$  is  $|\mathcal{F}| = 2^{n_1+n_2-1}$ .

**Lemma S1.** *Suppose Assumption 1 hold. Let  $\mathbf{W}_{\diamond} = (w_{\diamond,ij}) \in \mathbb{R}^{n_1, n_2}$  where  $w_{\diamond,ij} = \pi_{i,j}^{-1}$ . There exists a constant  $C_1 \geq 0$  such that with probability at least  $1 - 1/(n_1 + n_2)$ ,*

$$\frac{1}{n_1 n_2} \|\mathbf{T} \circ \mathbf{W}_{\diamond} - \mathbf{J}\| \leq C_1 \min \left\{ \frac{\log^{1/2}(n_1 + n_2)}{\sqrt{\pi_L(n_1 \wedge n_2)} n_1 n_2}, \frac{\sqrt{n_1 + n_2}}{\pi_L n_1 n_2} \right\}.$$

*Proof of Lemma S1.* We use two different proof techniques to show the bounds. Depending on the rate of  $\pi_L$ , one of these two bounds is faster.

First, we show the proof for deriving the second bound. As  $\{T_{ij}\}$  are Bernoulli random variables, each entry  $T_{ij} w_{\diamond,ij} - 1$  of matrix  $\mathbf{T} \circ \mathbf{W}_{\diamond} - \mathbf{J}$  is sub-Gaussian random variable. Thus according to the definition of the  $\psi_2$  norm, we have

$$\mathbb{E} \exp\{\log(2) \cdot (T_{ij} w_{\diamond,ij} - 1)^2 / (\pi_{ij}^{-1} - 1)^2\} \leq 2,$$

which implies that  $\|T_{ij} w_{\diamond,ij} - 1\|_{\psi_2} \leq \log^{-1/2} 2 \cdot (\pi_{ij}^{-1} - 1) \leq 2(\pi_{ij}^{-1} - 1)$ .

By Theorem S2 in Section D, taking  $K = \max_{i,j} \|T_{ij} w_{\diamond,ij} - 1\|_{\psi_2} \leq 2\pi_L^{-1}$  and  $t = (n_1 + n_2)^{1/2}$  in Theorem S2, there exists an absolute constant  $C_1 > 0$  such that

$$\|\mathbf{T} \circ \mathbf{W}_{\diamond} - \mathbf{J}\| \leq \frac{C_1 \sqrt{n_1 + n_2}}{\pi_L},$$

with probability at least  $1 - 2 \cdot \exp(-(n_1 + n_2))$ .

Next, we consider applying the Matrix Bernstein inequality to derive the first bound. For  $(n_1 n_2)^{-1} \|\mathbf{T} \circ \mathbf{W}_\diamond - \mathbf{J}\| = \|\sum_{i,j} (T_{ij} W_{\diamond,ij} - 1) \mathbf{J}_{ij} / (n_1 n_2)\|$ , where  $\mathbf{J}_{ij}$  has 1 for  $(i, j)$ -th, but 0 for all the remaining entries, let  $\mathbf{M}_{i,j} = (T_{ij} W_{\diamond,ij} - 1) \mathbf{J}_{ij}$ ,  $i = 1, \dots, n_1$ ,  $j = 1, \dots, n_2$ , then  $(n_1 n_2)^{-1} \|\mathbf{T} \circ \mathbf{W}_\diamond - \mathbf{J}\| = \|(n_1 n_2)^{-1} \sum_{i,j} \mathbf{M}_{i,j}\|$ . We can easily verify that  $\mathbb{E}(\mathbf{M}_{i,j}) = \mathbf{0}$  and  $\|\mathbf{M}_{i,j}\| \leq \max\{\pi_L^{-1} - 1, 1\}$  for each  $i, j$  by Assumption 1.

Since  $\mathbb{E}(T_{ij} W_{\diamond,ij} - 1)^2 = \pi_{ij}^{-1} - 1$ , we can show that

$$\begin{aligned} & \left\| \frac{1}{n_1 n_2} \sum_{i,j} \mathbb{E}(\mathbf{M}_{i,j} \mathbf{M}_{i,j}^\top) \right\| = \left\| \frac{1}{n_1 n_2} \sum_{i,j} \mathbb{E}(\mathbf{M}_{i,j}^\top \mathbf{M}_{i,j}) \right\| \\ & \leq \frac{1}{n_1 n_2} \max \left\{ \max_{1 \leq i \leq n_1} \sum_{j=1}^{n_2} |1/\pi_{ij} - 1|, \max_{1 \leq j \leq n_2} \sum_{i=1}^{n_1} |1/\pi_{ij} - 1| \right\} \\ & \leq \frac{1}{n_1 \wedge n_2} |1/\pi_L - 1|, \end{aligned}$$

where the first inequality comes from Corollary 2.3.2 in Golub & Van Loan (1996).

By Theorem S3 in Section D, with probability at least  $1 - 1/(n_1 + n_2)$ , we have

$$\frac{1}{n_1 n_2} \|\mathbf{T} \circ \mathbf{W}_\diamond - \mathbf{J}\| \leq 2 \max \left\{ \sqrt{\frac{2 |1/\pi_L - 1| \log(n_1 + n_2)}{(n_1 \wedge n_2) n_1 n_2}}, 2 \max \left\{ \frac{1}{\pi_L} - 1, 1 \right\} \frac{\log^{3/2}(n_1 + n_2)}{n_1 n_2} \right\}.$$

Overall, the conclusion follows. □

**Lemma S2.** *Suppose Assumption 1 holds. With probability at least  $1 - \exp\{-2^{-1}(\log 2)\pi_L^2 \sum_{i,j} \pi_{ij}^{-1}\}$ ,*

$$\|\mathbf{T} \circ \mathbf{W}_\diamond\|_F^2 \leq 2 \sum_{i,j} \pi_{ij}^{-1}.$$

*In particular, the probability is lower bounded by  $1 - \exp\{-2^{-1}(\log 2)n_1 n_2 \pi_L^2 \pi_U^{-1}\}$ .*

*Proof of Lemma S2.* Note that  $\|\mathbf{T} \circ \mathbf{W}_\diamond\|_F^2 = \sum_{i,j} T_{ij} \pi_{ij}^{-2}$ . Let  $\xi > 0$ . By Markov inequality, for any  $t \geq 0$ ,

$$\begin{aligned} \Pr(\|\mathbf{T} \circ \mathbf{W}_\diamond\|_F^2 \geq t) &= \Pr\{\exp(\xi \|\mathbf{T} \circ \mathbf{W}_\diamond\|_F^2) \geq \exp(\xi t)\} \leq \exp(-\xi t) \mathbb{E} \exp\left(\xi \sum_{i,j} T_{ij} \pi_{ij}^{-2}\right) \\ &= \exp(-\xi t) \prod_{i,j} \mathbb{E} \exp(\xi T_{ij} \pi_{ij}^{-2}). \end{aligned}$$

For each  $(i, j)$ , due to the inequality  $1 + x \leq \exp(x)$  for  $x \geq 0$ ,

$$\mathbb{E} \exp(\xi T_{ij} \pi_{ij}^{-2}) = 1 + \{\exp(\xi \pi_{ij}^{-2}) - 1\} \pi_{ij} \leq \exp[\{\exp(\xi \pi_{ij}^{-2}) - 1\} \pi_{ij}].$$

Combining with the above result and taking  $t = 2 \sum_{i,j} \pi_{ij}^{-1}$ ,

$$\begin{aligned} \Pr\left(\|\mathbf{T} \circ \mathbf{W}_\diamond\|_F^2 \geq 2 \sum_{i,j} \pi_{ij}^{-1}\right) &\leq \exp\left[-2\xi \sum_{i,j} \pi_{ij}^{-1} + \sum_{i,j} \{\exp(\xi \pi_{ij}^{-2}) - 1\} \pi_{ij}\right] \\ &= \exp\left[-\sum_{i,j} \pi_{ij} \{1 + 2\xi \pi_{ij}^{-2} - \exp(\xi \pi_{ij}^{-2})\}\right]. \end{aligned}$$

Note the above inequality holds for any  $\xi > 0$ .

Next, we focus on the term  $g(\xi\pi_{ij}^{-2})$  where  $g(x) = 1 + 2x - \exp(x)$  for  $x \geq 0$ . It is easy to show that  $g$  attains its maximum at  $x = \log 2$ , and  $g(\log 2) = 2 \log 2 - 1 > 0$ . Also,  $g(x)$  is increasing for  $0 \leq x \leq \log 2$ .

Take  $\xi = (\log 2)\pi_L^2$ . Then  $0 \leq \xi\pi_{ij}^{-2} \leq \log 2$ , and hence  $g(\xi\pi_{ij}^{-2}) > 0$ , for all  $i, j$ . The lower bound of  $g(\xi\pi_{ij}^{-2})$  is crucial in determining the order of the probability bound. Since  $g(x) \geq x/2$  for  $0 \leq x \leq \log 2$ ,

$$g(\xi\pi_{ij}^{-2}) = g(\pi_L^2\pi_{ij}^{-2} \log 2) \geq \frac{\log 2}{2}\pi_L^2\pi_{ij}^{-2}, \quad \forall i, j$$

We conclude that

$$\sum_{i,j} \pi_{ij} \{1 + 2\xi\pi_{ij}^{-2} - \exp(\xi\pi_{ij}^{-2})\} \geq \frac{\log 2}{2}\pi_L^2 \sum_{i,j} \pi_{ij}^{-1} \geq \frac{\log 2}{2}n_2n_2\pi_L^2\pi_U^{-1},$$

which leads to the desired result. □

With these two lemmas, we are posed to prove Theorem 1.

*Proof of Theorem 1.* By Lemma S2, we can show that with probability at least  $1 - \exp\{-2^{-1}(\log 2)\pi_L^2 \sum_{i,j} \pi_{ij}^{-1}\}$ ,  $\|\mathbf{T} \circ \mathbf{W}_\diamond\|_F \leq (2 \sum_{i,j} \pi_{ij}^{-1})^{1/2}$  and hence  $\mathbf{W}_\diamond$  is feasible for the constrained optimization (5).

Based on the definition of the proposed estimator  $\widehat{\mathbf{W}}$ , we have

$$\begin{aligned} S(\widehat{\mathbf{W}}, \Delta) &= \frac{1}{n_1n_2} \left| \left\langle \Delta, (\mathbf{T} \circ \widehat{\mathbf{W}} - \mathbf{J}) \circ \Delta \right\rangle \right| \\ &\leq \frac{1}{\sqrt{n_1n_2}} \|\mathbf{T} \circ \mathbf{W}_\diamond - \mathbf{J}\| \|\Delta\|_{\max}^2 \\ &\leq \frac{\beta'^2}{\sqrt{n_1n_2}} \|\mathbf{T} \circ \mathbf{W}_\diamond - \mathbf{J}\|. \end{aligned}$$

The desired result then follows from Lemma S1. □

Our theoretical result of the final estimator  $\widehat{\mathbf{A}}$  will be based on a key lemma (Lemma S4), which establishes the dual of max norm of random matrix  $\epsilon$  with general entry-wise scaling. Before we prove Lemma S4, we now show a comparison theorem between sub-Gaussian complexity and Gaussian complexity. This result (Lemma S3) extends Theorem 8 in Banerjee et al. (2014) to allow arbitrary entrywise scaling.

Define the Gaussian width and Gaussian complexity of the set  $\mathcal{A}$  respectively as

$$w(\mathcal{A}) = \mathbf{E}_{\mathbf{G}} \left[ \sup_{\mathbf{A} \in \mathcal{A}} \langle \mathbf{A}, \mathbf{G} \rangle \right] \quad \text{and} \quad \tilde{w}(\mathcal{A}) = \mathbf{E}_{\mathbf{G}} \left[ \sup_{\mathbf{A} \in \mathcal{A}} |\langle \mathbf{A}, \mathbf{G} \rangle| \right],$$

where  $\mathbf{G} = (G_{ij})$  and each  $\{G_{ij}\}$  are independent standard Gaussian random variables. In our study,  $\mathcal{A}$  is a max-norm ball, and so is symmetric. Therefore Gaussian width and Gaussian complexity are equivalent.

**Lemma S3** (Extension of Theorem 8 in Banerjee et al. (2014)). *Suppose Assumption 2 holds. Let  $\mathbf{B} = (B_{ij}) \in \mathbb{R}^{n_1 \times n_2}$  be a fixed matrix such that  $B_{ij} \geq 0$  for each  $i, j$ . Then*

$$E[\|\mathbf{B} \circ \epsilon\|_{\max}^*] \leq \eta_0 \tau E[\|\mathbf{B} \circ \mathbf{G}\|_{\max}^*],$$

where  $\|\cdot\|_{\max}^*$  is the dual norm of max norm,  $\mathbf{G} = (G_{ij})$  has independent standard Gaussian entries which are also independent of the random errors  $\{\epsilon_{ij}\}$ , and  $\eta_0 > 0$  is an absolute constant.

*Proof of Lemma S3.* Since the desired result obviously holds if  $\mathbf{B} = \mathbf{0}$ , we assume  $\mathbf{B} \neq \mathbf{0}$  in the rest of this proof. By definition,  $\|\mathbf{C}\|_{\max}^* = \sup_{\|\mathbf{X}\|_{\max} \leq 1} \langle \mathbf{X}, \mathbf{C} \rangle$  for any  $\mathbf{C} \in \mathbb{R}^{n_1 \times n_2}$ . Therefore our goal is to bound a scaled sub-Gaussian complexity via the corresponding scaled Gaussian complexity. We now extend the proof of Theorem 8 of Banerjee

et al. (2014) to allow an additional entrywise scaling parameter  $\mathbf{B}$ . We start with considering the sub-Gaussian process  $Y_{\mathbf{X}} = \langle \mathbf{X}, \mathbf{B} \circ \epsilon \rangle$  and the Gaussian process  $Z_{\mathbf{X}} = \langle \mathbf{X}, \mathbf{B} \circ \mathbf{G} \rangle$ , both indexed by  $\mathbf{X} \in \mathcal{B}_{\max}(1)$ . For any  $\mathbf{X}_1, \mathbf{X}_2 \in \mathcal{B}_{\max}(1)$ , by the general Hoeffding's inequality given in Theorem 2.6.3 of Vershynin (2018), we have

$$\Pr(|Y_{\mathbf{X}_1} - Y_{\mathbf{X}_2}| \geq t) \leq 2 \cdot \exp\left(-\frac{C_1 t^2}{\tau^2 \|\mathbf{B} \circ (\mathbf{X}_1 - \mathbf{X}_2)\|_F^2}\right), \quad t > 0, \quad (\text{S3})$$

where  $C_1 > 0$  is an absolute constant. One can show that  $\mathbb{E}(Z_{\mathbf{X}_1} - Z_{\mathbf{X}_2})^2 = \|\mathbf{B} \circ (\mathbf{X}_1 - \mathbf{X}_2)\|_F^2$ . According to Theorem 2.1.5 of Talagrand (2006), we can apply the generic chaining argument for upper bounds on the empirical processes  $\sqrt{c}Y_{\mathbf{X}}/\tau$  and  $Z_{\mathbf{X}}$ . This yields

$$\mathbb{E}_{\epsilon} \left[ \sup_{\mathbf{X}_1, \mathbf{X}_2 \in \mathcal{B}_{\max}(1)} |Y_{\mathbf{X}_1} - Y_{\mathbf{X}_2}| \right] \leq \eta_1 \tau \mathbb{E}_{\mathbf{G}} \left[ \sup_{\mathbf{X}_1 \in \mathcal{B}_{\max}(1)} Z_{\mathbf{X}_1} \right] = \eta_1 \tau w(\mathcal{B}_{\max}(1)), \quad (\text{S4})$$

where  $\eta_1$  is an absolute constant. Further, we can see that if  $\mathbf{X} \in \mathcal{B}_{\max}(1)$ , then  $-\mathbf{X} \in \mathcal{B}_{\max}(1)$ . Then we have

$$\begin{aligned} \sup_{\mathbf{X}_1, \mathbf{X}_2 \in \mathcal{B}_{\max}(1)} |Y_{\mathbf{X}_1} - Y_{\mathbf{X}_2}| &= \sup_{\mathbf{X}_1, \mathbf{X}_2 \in \mathcal{B}_{\max}(1)} (Y_{\mathbf{X}_1} - Y_{\mathbf{X}_2}) = \sup_{\mathbf{X}_1 \in \mathcal{B}_{\max}(1)} Y_{\mathbf{X}_1} + \sup_{\mathbf{X}_2 \in \mathcal{B}_{\max}(1)} (-Y_{\mathbf{X}_2}) \\ &= \sup_{\mathbf{X}_1 \in \mathcal{B}_{\max}(1)} Y_{\mathbf{X}_1} + \sup_{-\mathbf{X}_2 \in \mathcal{B}_{\max}(1)} (\langle -\mathbf{X}_2, \mathbf{B} \circ \epsilon \rangle) = 2 \sup_{\mathbf{X}_1 \in \mathcal{B}_{\max}(1)} Y_{\mathbf{X}_1}. \end{aligned}$$

By taking the expectation on  $\epsilon$  on both side, we have

$$\mathbb{E}_{\epsilon} \left[ \sup_{\mathbf{X}_1, \mathbf{X}_2 \in \mathcal{B}_{\max}(1)} |Y_{\mathbf{X}_1} - Y_{\mathbf{X}_2}| \right] = 2 \mathbb{E}_{\epsilon} \left[ \sup_{\mathbf{X}_1 \in \mathcal{B}_{\max}(1)} Y_{\mathbf{X}_1} \right]. \quad (\text{S5})$$

As a result, with  $\eta_0 = \eta_1/2$ , we have

$$\mathbb{E}_{\epsilon} \left[ \sup_{\mathbf{X} \in \mathcal{B}_{\max}(1)} \langle \mathbf{B} \circ \epsilon, \mathbf{X} \rangle \right] = \mathbb{E}_{\epsilon} \left[ \sup_{\mathbf{X} \in \mathcal{B}_{\max}(1)} Y_{\mathbf{X}} \right] \leq \eta_0 \tau w(\mathcal{B}_{\max}(1)). \quad (\text{S6})$$

That completes the proof.  $\square$

**Lemma S4.** *Suppose Assumption 2 holds. Let  $\mathbf{B} = (B_{ij}) \in \mathbb{R}^{n_1 \times n_2}$  be a fixed matrix such that  $B_{ij} \geq 0$  for each  $i, j$ . There exists an absolute constant  $C_2 > 0$  such that, with probability at least  $1 - 2 \exp\{-(n_1 + n_2)\}$ ,*

$$\|\mathbf{B} \circ \epsilon\|_{\max}^* \leq C_2 \tau \|\mathbf{B}\|_F \sqrt{n_1 + n_2}.$$

*Proof of Lemma S4.* Define the set

$$\tilde{\mathcal{B}}_{\max}(\beta) = \{\mathbf{B} \circ \mathbf{X} : \mathbf{X} \in \mathcal{B}_{\max}(\beta)\} \subset \mathbb{R}^{n_1 \times n_2}.$$

Note that we have

$$\mathbb{E}_{\mathbf{G}} \left[ \sup_{\mathbf{X} \in \mathcal{B}_{\max}(1)} \langle \mathbf{B} \circ \mathbf{G}, \mathbf{X} \rangle \right] = \mathbb{E}_{\mathbf{G}} \left[ \sup_{\mathbf{X} \in \mathcal{B}_{\max}(1)} \langle \mathbf{G}, \mathbf{B} \circ \mathbf{X} \rangle \right] = w(\tilde{\mathcal{B}}_{\max}(1)).$$

Write  $\tilde{\mathcal{F}} = \{\mathbf{B} \circ \mathbf{X} : \mathbf{X} \in \mathcal{F}\}$ . By the the relationship (S2), we have

$$\tilde{\mathcal{F}} \subseteq \tilde{\mathcal{B}}_{\max}(1) \subseteq \{\mathbf{B} \circ \mathbf{X} : \mathbf{X} \in K_G \text{conv}(\mathcal{F})\} = K_G \{\mathbf{B} \circ \mathbf{X} : \mathbf{X} \in \text{conv}(\mathcal{F})\} = K_G \text{conv}(\tilde{\mathcal{F}}).$$

Due to the properties of Gaussian width (see, e.g., Appendix A.1 of Banerjee et al., 2014), we have

$$w(\tilde{\mathcal{B}}_{\max}(1)) \leq w(K_G \text{conv}(\tilde{\mathcal{F}})) = K_G w(\text{conv}(\tilde{\mathcal{F}})) = K_G w(\tilde{\mathcal{F}}).$$

As for any  $\mathbf{X} \in \mathcal{F}$ , we have

$$\|\mathbf{B} \circ \mathbf{X}\|_F = \|\mathbf{B}\|_F,$$

and so  $\langle \mathbf{G}, \mathbf{B} \circ \mathbf{X} \rangle \sim \mathcal{N}(0, \|\mathbf{B}\|_F^2)$ . Recall that the  $|\mathcal{F}| = 2^{n_1+n_2-1}$ . By Proposition 3.1(ii) of Koltchinskii (2011), we have

$$w(\tilde{\mathcal{F}}) \leq C_3 \|\mathbf{B}\|_F \sqrt{n_1 + n_2}.$$

where  $C_3$  is an absolute constant. By Lemma S3, we conclude that

$$\begin{aligned} \mathbf{E}_\epsilon \left[ \sup_{\mathbf{X} \in \mathcal{B}_{\max}(1)} \langle \mathbf{B} \circ \epsilon, \mathbf{X} \rangle \right] &\leq \eta_0 \tau \mathbf{E}_G \left[ \sup_{\mathbf{X} \in \mathcal{B}_{\max}(1)} \langle \mathbf{B} \circ \mathbf{G}, \mathbf{X} \rangle \right] \\ &= \eta_0 \tau w(\tilde{\mathcal{B}}_{\max}(1)) \leq K_G \eta_0 \tau w(\tilde{\mathcal{F}}) \\ &\leq C_3 K_G \eta_0 \tau \|\mathbf{B}\|_F \sqrt{n_1 + n_2}. \end{aligned} \quad (\text{S7})$$

Let  $\varphi(\mathbf{Z}) = \sup_{\|\mathbf{X}\|_{\max} \leq 1} \langle \mathbf{B} \circ \mathbf{Z}, \mathbf{X} \rangle$  for any  $\mathbf{Z} \in \mathbb{R}^{n_1 \times n_2}$ . We aim to provide the concentration of  $\varphi(\epsilon)$  to its expectation. For notational simplicity, we will focus on the setting with  $B_{ij} > 0$  for all  $i, j$ ; otherwise, one can reduce the support of  $\varphi$  to those entries corresponding to non-zero  $B_{ij}$ . Due to the possibly unbounded support of  $\epsilon$ , we adopt an extension of McDiarmid's inequality Kontorovich (2014) with unbounded diameter. For any  $\mathbf{Z}_1 = (Z_{1,ij}), \mathbf{Z}_2 = (Z_{2,ij}) \in \mathbb{R}^{n_1 \times n_2}$ ,

$$\begin{aligned} |\varphi(\mathbf{Z}_1) - \varphi(\mathbf{Z}_2)| &\leq \sup_{\|\mathbf{X}\|_{\max} \leq 1} |\langle \mathbf{B} \circ \mathbf{Z}_1, \mathbf{X} \rangle - \langle \mathbf{B} \circ \mathbf{Z}_2, \mathbf{X} \rangle| \\ &\leq \sup_{\|\mathbf{X}\|_{\max} \leq 1} \sum_{i,j} B_{ij} |X_{ij}| |Z_{1,ij} - Z_{2,ij}| \\ &\leq \sup_{\mathbf{X} \in K_G \text{conv}(\mathcal{F})} \sum_{i,j} B_{ij} |X_{ij}| |Z_{1,ij} - Z_{2,ij}| \\ &\leq q(\mathbf{Z}_1, \mathbf{Z}_2), \end{aligned}$$

where  $q(\mathbf{Z}_1, \mathbf{Z}_2) =: \sum_{i,j} q_{ij}(Z_{1,ij}, Z_{2,ij}) =: \sum_{i,j} K_G B_{ij} |Z_{1,ij} - Z_{2,ij}|$  is a metric. Therefore  $\varphi$  is 1-Lipschitz with respect to the metric  $q$ . Let  $\epsilon'_{ij}$  be an independent copy of  $\epsilon_{ij}$ , and  $\gamma_{ij}$  be an independent Rademacher random variable. We can show that the subgaussian norm of  $\gamma_{ij} q_{ij}(\epsilon_{ij}, \epsilon'_{ij})$  is bounded by  $C_4 \tau b_{ij}$  for some absolute constant  $C_4 > 0$ . By Theorem 1 of Kontorovich (2014), we conclude that

$$\mathbb{P}(|\varphi(\epsilon) - \mathbf{E}\varphi(\epsilon)| > t) \leq 2 \exp\left(-\frac{t^2}{2C_4 \tau^2 \|\mathbf{B}\|_F^2}\right), \quad t \geq 0.$$

Combining with (S7), we achieve the desired result.  $\square$

**Lemma S5.** *Suppose Assumptions 1 and 2 hold. There exists an absolute constant  $C_2 > 0$  such that with probability at least  $1 - 2 \exp\{- (n_1 + n_2)\}$ ,*

$$\left\| \mathbf{T} \circ \widehat{\mathbf{W}} \circ \epsilon \right\|_{\max}^* \leq C_2 \tau \kappa \sqrt{n_1 + n_2}.$$

*Proof of Lemma S5.* Notice that  $\epsilon$  is independent of  $\mathbf{T}$ , and  $\widehat{\mathbf{W}}$  is a function of  $\mathbf{T}$ . By Lemma S4, conditioned on  $\mathbf{T}$ , we have

$$\left\| \mathbf{T} \circ \widehat{\mathbf{W}} \circ \epsilon \right\|_{\max}^* \leq C_2 \tau \|\mathbf{T} \circ \widehat{\mathbf{W}}\|_F \sqrt{n_1 + n_2}, \quad (\text{S8})$$

with conditional probability at least  $1 - 2 \exp\{- (n_1 + n_2)\}$ . Since the probability bound does not depend on  $\mathbf{T}$ , (S8) holds with the same probability bound unconditionally. By construction,  $\|\mathbf{T} \circ \widehat{\mathbf{W}}\|_F \leq \kappa$ , we have the desired result.  $\square$

*Proof of Theorem 2.* It follows from the definition of  $\widehat{\mathbf{A}}$  that for  $\mathbf{A}_* \in \mathbb{R}^{n_1 \times n_2}$  with  $\|\mathbf{A}_*\|_{\max} \leq \beta$ ,

$$\frac{1}{n_1 n_2} \left\| \mathbf{T} \circ \widehat{\mathbf{W}}^{\circ 1/2} \circ (\widehat{\mathbf{A}} - \mathbf{Y}) \right\|_F^2 \leq \frac{1}{n_1 n_2} \left\| \mathbf{T} \circ \widehat{\mathbf{W}}^{\circ 1/2} \circ (\mathbf{A}_* - \mathbf{Y}) \right\|_F^2 + \mu(\|\mathbf{A}_*\|_* - \|\widehat{\mathbf{A}}\|_*). \quad (\text{S9})$$

Since we can rewrite the first term in the left hand side of (S9) as

$$\frac{1}{n_1 n_2} \left\| \mathbf{T} \circ \widehat{\mathbf{W}}^{\circ 1/2} \circ (\widehat{\mathbf{A}} - \mathbf{Y}) \right\|_F^2 = \frac{1}{n_1 n_2} \left\| \mathbf{T} \circ \widehat{\mathbf{W}}^{\circ 1/2} \circ (\widehat{\mathbf{A}} - \mathbf{A}_* + \mathbf{A}_* - \mathbf{Y}) \right\|_F^2,$$

the inequality (S9) leads to

$$\begin{aligned} \frac{1}{n_1 n_2} \left\| \mathbf{T} \circ \widehat{\mathbf{W}}^{\circ 1/2} \circ (\widehat{\mathbf{A}} - \mathbf{A}_\star) \right\|_F^2 &\leq \frac{2}{n_1 n_2} \left\langle \mathbf{T} \circ \widehat{\mathbf{W}}^{\circ 1/2} \circ (\widehat{\mathbf{A}} - \mathbf{A}_\star), \mathbf{T} \circ \widehat{\mathbf{W}}^{\circ 1/2} \circ (\mathbf{Y} - \mathbf{A}_\star) \right\rangle + \mu (\|\mathbf{A}_\star\|_* - \|\widehat{\mathbf{A}}\|_*) \\ &= \frac{2}{n_1 n_2} \left\langle \widehat{\mathbf{A}} - \mathbf{A}_\star, \mathbf{T} \circ \widehat{\mathbf{W}} \circ \boldsymbol{\epsilon} \right\rangle + \mu (\|\mathbf{A}_\star\|_* - \|\widehat{\mathbf{A}}\|_*). \end{aligned}$$

Therefore, due to Theorem 1, Lemma S5 and condition of  $\mu$ , with the property that  $\|\mathbf{A}_\star\|_* \leq \sqrt{n_1 n_2} \|\mathbf{A}_\star\|_{\max}$ , we have

$$\begin{aligned} \frac{1}{n_1 n_2} \left\| \widehat{\mathbf{A}} - \mathbf{A}_\star \right\|_F^2 &\leq \frac{1}{n_1 n_2} \left\langle \widehat{\mathbf{A}} - \mathbf{A}_\star, (\mathbf{T} \circ \widehat{\mathbf{W}} - \mathbf{J}) \circ (\mathbf{A}_\star - \widehat{\mathbf{A}}) \right\rangle + \frac{1}{n_1 n_2} \left\| \mathbf{T} \circ \widehat{\mathbf{W}}^{\circ (1/2)} \circ (\widehat{\mathbf{A}} - \mathbf{A}_\star) \right\|_F^2 \\ &\leq S(\widehat{\mathbf{W}}, \widehat{\mathbf{A}} - \mathbf{A}_\star) + \left| \frac{2}{n_1 n_2} \left\langle \widehat{\mathbf{A}} - \mathbf{A}_\star, \mathbf{T} \circ \widehat{\mathbf{W}} \circ \boldsymbol{\epsilon} \right\rangle \right| + \mu (\|\mathbf{A}_\star\|_* - \|\widehat{\mathbf{A}}\|_*) \\ &\leq S(\widehat{\mathbf{W}}, \widehat{\mathbf{A}} - \mathbf{A}_\star) + \frac{2}{n_1 n_2} \left\| \widehat{\mathbf{A}} - \mathbf{A}_\star \right\|_{\max} \left\| \mathbf{T} \circ \widehat{\mathbf{W}} \circ \boldsymbol{\epsilon} \right\|_{\max}^* + \mu \|\mathbf{A}_\star\|_* \\ &\leq C_1 (\beta^2 + \beta) \min \left\{ \frac{\log^{1/2}(n_1 + n_2)}{\sqrt{\pi_L (n_1 \wedge n_2)}}, \frac{\sqrt{n_1 + n_2}}{\pi_L \sqrt{n_1 n_2}} \right\} + \frac{4C_2 \beta \tau \kappa \sqrt{n_1 + n_2}}{n_1 n_2} \end{aligned} \quad (\text{S10})$$

$$\leq C_1 (\beta^2) \min \left\{ \frac{\log^{1/2}(n_1 + n_2)}{\sqrt{\pi_L (n_1 \wedge n_2)}}, \frac{\sqrt{n_1 + n_2}}{\pi_L \sqrt{n_1 n_2}} \right\} + \frac{4C_2 \beta \tau \kappa \sqrt{n_1 + n_2}}{n_1 n_2}. \quad (\text{S11})$$

with probability at least  $1 - \exp\{-2^{-1}(\log 2)\pi_L^2 \sum_{i,j} \pi_{ij}^{-1}\} - 2 \exp\{-(n_1 + n_2)\} - 1/(n_1 + n_2)$ .  $\square$

*Proof of Theorem 3.* Without loss of generality, we assume that  $n_1 \geq n_2$ . For some constant  $0 \leq \gamma \leq 1$  such that  $B = \sigma^{-2}(\sigma \wedge \beta)^2/(\gamma^2)$  is an integer and  $B \leq n_2$ , define

$$\mathcal{C}_1 = \left\{ \tilde{\mathbf{A}} = (A_{ij}) \in \mathbb{R}^{n_1 \times B} : A_{ij} \in \{0, \gamma\beta\}, \forall 1 \leq i \leq n_1, 1 \leq j \leq B \right\},$$

and consider the associated set of block matrices

$$\mathcal{A}(\mathcal{C}_1) = \left\{ \mathbf{A} = \left( \tilde{\mathbf{A}} \mid \dots \mid \tilde{\mathbf{A}} \mid \mathbf{0} \right) \in \mathbb{R}^{n_1 \times n_2} : \tilde{\mathbf{A}} \in \mathcal{C}_1 \right\},$$

where  $\mathbf{0}$  denotes the  $n_1 \times (n_2 - B \lfloor n_2/B \rfloor)$  zero matrix.

It is easy to see that for any  $\mathbf{A} \in \mathcal{A}(\mathcal{C}_1)$ , we have that  $\|\mathbf{A}\|_{\max} \leq \sqrt{B} \|\mathbf{A}\|_{\infty} \leq \beta$ . Due to Lemma 2.9 in Tsybakov (2009), there exists a subset  $\mathcal{A}^0 \subset \mathcal{A}(\mathcal{C}_1)$  containing the zero  $n_1 \times n_2$  matrix  $\mathbf{0}$  where  $\text{Card}(\mathcal{A}^0) \geq 2^{Bn_1/8} + 1$  and for any two distinct elements  $\mathbf{A}_1$  and  $\mathbf{A}_2$  of  $\mathcal{A}^0$ ,

$$\|\mathbf{A}_1 - \mathbf{A}_2\|_F^2 \geq \frac{n_1 B}{8} \left\{ \gamma^2 \beta^2 \left\lfloor \frac{n_2}{B} \right\rfloor \right\} \geq \frac{n_1 n_2 \gamma^2 \beta^2}{16}. \quad (\text{S12})$$

For any  $\mathbf{A} \in \mathcal{A}^0$ , from the noisy observed model in section 2.2, the probability distribution  $\mathbb{P}_{\mathbf{A}} = \prod_{i,j} [(2\pi\sigma^2)^{-1/2} \exp\{-(Y_{ij} - A_{ij})^2/(2\sigma^2)\}]^{T_{ij}}$ . Take  $\mathbb{P}_{\mathbf{0}} = \prod_{i,j} [(2\pi\sigma^2)^{-1/2} \exp\{-Y_{ij}^2/(2\sigma^2)\}]^{T_{ij}}$ . Thus the Kullback-Leibler divergence  $K(\mathbb{P}_{\mathbf{0}}, \mathbb{P}_{\mathbf{A}}) = \mathbb{E}_{\mathbb{P}_{\mathbf{0}}}(\log(\mathbb{P}_{\mathbf{0}}/\mathbb{P}_{\mathbf{A}}))$  between  $\mathbb{P}_{\mathbf{0}}$  and  $\mathbb{P}_{\mathbf{A}}$  satisfies

$$K(\mathbb{P}_{\mathbf{0}}, \mathbb{P}_{\mathbf{A}}) = \mathbb{E}_{\mathbb{P}_{\mathbf{0}}} \left( \sum_{ij} T_{ij} \frac{A_{ij}^2 - 2A_{ij}Y_{ij}}{2\sigma^2} \right) = \frac{\|\boldsymbol{\Pi}^{\circ 1/2} \circ \mathbf{A}\|_F^2}{2\sigma^2} \leq \frac{\gamma^2 \beta^2 \sum_{i=1}^{n_1} \sum_{j=1}^{n_2} \pi_{ij}}{2\sigma^2} \leq C_5 \frac{\gamma^2 \beta^2 n_1 n_2 \pi_L}{2\sigma^2},$$

for some positive constant  $C_5$ . The last inequality is due to the condition that  $n_1 n_2 \pi_L \asymp \sum_{i=1}^{n_1} \sum_{j=1}^{n_2} \pi_{ij}$ .

From above we deduce the condition

$$\frac{1}{\text{Card}(\mathcal{A}^0) - 1} \sum_{\mathbf{A} \in \mathcal{A}^0} K(\mathbb{P}_{\mathbf{0}}, \mathbb{P}_{\mathbf{A}}) \leq \lambda \log(\text{Card}(\mathcal{A}^0) - 1), \quad (\text{S13})$$

The above condition is valid when we take

$$\gamma^2 = C_6 \left( \frac{(\sigma \wedge \beta)^2}{\beta^2 n_2 \pi_L} \right)^{1/2}$$

for some constant  $C_6$  that depends on  $\lambda$ . Also, one can verify that under the conditions  $\pi_L^{-1} = \mathcal{O}(\beta^2(n_1 \wedge n_2)/(\sigma \wedge \beta)^2)$  and  $\pi_L^{1/2} = \mathcal{O}((n_1 \wedge n_2)^{1/2} \sigma^2 / [\beta(\sigma \wedge \beta)])$ ,  $\gamma \leq 1$  and  $B \leq n_2$ . Then we substitute  $\gamma^2$  in the bound of S12 and we achieve the final bound as the one showed in the Theorem.

Together with the similar argument when  $n_2 \geq n_1$ , the result now follows by application of Theorem 2.5 in Tsybakov (2009). This completes the proof.  $\square$

**Lemma S6.** *Suppose Assumption 2 hold. For a fixed matrix  $\mathbf{B} = (B_{ij}) \in \mathbb{R}^{n_1 \times n_2}$  where  $B_{ij} \geq 0$ , there exists an absolute constant  $C_5 > 0$  such that, with probability at least  $1 - 2 \exp(-(n_1 + n_2))$ ,*

$$\|\mathbf{B} \circ \epsilon\| \leq C_5 \|\mathbf{B}\|_\infty \tau (\sqrt{n_1} + \sqrt{n_2}).$$

*Proof.* By the definition of  $\|\cdot\|_{\psi_2}$ ,

$$\max_{i,j} \|B_{ij} \epsilon_{ij}\|_{\psi_2} \leq \|\mathbf{B}\|_\infty \tau.$$

Apply Theorem S2 in Section D, and take  $t = \sqrt{n_1} + \sqrt{n_2}$  in Theorem S2. Then conclusion follows.  $\square$

### C. Non-asymptotic Error Bound under Low-rank Settings and Asymptotically Homogeneous Missingness

**Theorem S1.** *Suppose Assumption 2 hold and  $\pi_L \asymp \pi_U \asymp \pi$ . Assume  $\|\mathbf{A}_*\|_{\max} \leq \beta$  and  $\mathbf{A}_*$  has rank  $R$ . If  $\kappa' = \kappa - \|\mathbf{T}\|_F$  is bounded and  $\mu \asymp \sqrt{\{\tau^2 \pi \log(n_1 + n_2)\} \{(n_1 \wedge n_2) n_1 n_2\}^{-1}}$ , then there exists a constant  $C_6 > 0$ , such that with probability at least  $1 - 3(n_1 + n_2)^{-1}$ ,*

$$d^2(\hat{\mathbf{A}}, \mathbf{A}_*) \leq \frac{C_6 R (\tau^2 \vee \|\mathbf{A}_*\|_\infty^2) \log(n_1 + n_2)}{[\pi(n_1 \wedge n_2)]^{-1}}.$$

*Proof outline.* From the basic inequality, we have

$$\frac{1}{n_1 n_2} \|\mathbf{T} \circ \widehat{\mathbf{W}}^{1/2} \circ (\hat{\mathbf{A}} - \mathbf{A}_*)\|_F^2 \leq \frac{2}{n_1 n_2} \langle \hat{\mathbf{A}} - \mathbf{A}_*, \mathbf{T} \circ \widehat{\mathbf{W}} \circ \epsilon \rangle + \mu \|\mathbf{A}_*\|_* - \mu \|\hat{\mathbf{A}}\|_*.$$

Note that weights are restricted to be greater than 1. We then have

$$\frac{1}{n_1 n_2} \|\mathbf{T} \circ (\hat{\mathbf{A}} - \mathbf{A}_*)\|_F^2 \leq \frac{1}{n_1 n_2} \|\mathbf{T} \circ \widehat{\mathbf{W}}^{1/2} \circ (\hat{\mathbf{A}} - \mathbf{A}_*)\|_F^2 \leq \frac{2}{n_1 n_2} \|\hat{\mathbf{A}} - \mathbf{A}_*\|_* \|\mathbf{T} \circ \widehat{\mathbf{W}} \circ \epsilon\| + \mu (\|\mathbf{A}_*\|_* - \|\hat{\mathbf{A}}\|_*).$$

Due to the constraint of  $\kappa'$ ,  $\|\widehat{\mathbf{W}}\|_\infty$  is bounded, we can use Lemma S7 to derive the bound of  $\|\mathbf{T} \circ \widehat{\mathbf{W}} \circ \epsilon\|$ . The remaining argument is rather standard and the same as the proof for No-weighted estimators with nuclear norm regularization (Klopp, 2014).  $\square$

**Lemma S7.** *Suppose assumptions in Corollary S1 hold. Then there exists a constant  $C_7 > 0$  such that, with probability at least  $1 - (n_1 + n_2)$ ,*

$$\frac{1}{n_1 n_2} \|\mathbf{T} \circ \widehat{\mathbf{W}} \circ \epsilon\| \leq C_7 \sqrt{\frac{\tau^2 \pi \log(n_1 + n_2)}{(n_1 \wedge n_2) n_1 n_2}}$$

*Proof.* The proof is very similar as the proof in Lemma S1.

We consider applying the Matrix Bernstein inequality for random matrices with bounded sub-exponential norm.

Due to the constraint of  $\kappa'$ , there exists a constant  $C_8$  such that  $\|\widehat{\mathbf{W}}\|_\infty \leq C_8$ .

For  $(n_1 n_2)^{-1} \|\mathbf{T} \circ \widehat{\mathbf{W}} \circ \boldsymbol{\epsilon}\| = \|\sum_{i,j} (T_{ij} \widehat{W}_{i,j} \epsilon_{ij}) \mathbf{J}_{ij} / (n_1 n_2)\|$ , where  $\mathbf{J}_{ij}$  has 1 for  $(i, j)$ -th, but 0 for all the remaining entries, let  $\mathbf{M}_{i,j} = (T_{ij} \widehat{W}_{i,j} \epsilon_{ij}) \mathbf{J}_{ij}$ , then  $(n_1 n_2)^{-1} \|\mathbf{T} \circ \widehat{\mathbf{W}} \circ \boldsymbol{\epsilon}\| = \|(n_1 n_2)^{-1} \sum_{i,j} \mathbf{M}_{i,j}\|$ . We can easily verify that  $\mathbf{E}(\mathbf{M}_{i,j}) = \mathbf{0}$ . Note that  $\epsilon_{ij}$  are sub-Gaussian random variables and therefore sub-exponential random variables. Then  $\max_{i,j} \|\mathbf{M}_{i,j}\|_{\psi_1} \leq \max_{i,j} \|T_{ij} \widehat{W}_{i,j} \epsilon_{ij}\|_{\psi_1} \leq C_9 \tau$ , where  $\|\cdot\|_{\psi_1}$  is the sub-exponential norm of a random variable and  $C_9$  is some constant depending on the  $C_8$ .

Since  $\mathbf{E}(T_{ij} \widehat{W}_{i,j} \epsilon_{ij})^2 \leq c C_8^2 \pi_{ij} \tau^2$  for some absolute constant  $c$ , we can show that

$$\begin{aligned} & \left\| \frac{1}{n_1 n_2} \sum_{i,j} \mathbf{E}(\mathbf{M}_{i,j} \mathbf{M}_{i,j}^\top) \right\| = \left\| \frac{1}{n_1 n_2} \sum_{i,j} \mathbf{E}(\mathbf{M}_{i,j}^\top \mathbf{M}_{i,j}) \right\| \\ & \leq \frac{1}{n_1 n_2} \max \left\{ \max_{1 \leq i \leq n_1} \sum_{j=1}^{n_2} c_2 \pi_{ij} \tau^2, \max_{1 \leq j \leq n_2} \sum_{i=1}^{n_1} c_2 \pi_{ij} \tau^2 \right\} \\ & \leq \frac{c_3 \tau^2}{n_1 \wedge n_2} \pi, \end{aligned}$$

for some constant  $c_3$ .

By Proposition 11 in [Klopp \(2014\)](#), there exists a constant  $C_7$ , such that with probability at least  $1 - 1/(n_1 + n_2)$ ,

$$\frac{1}{n_1 n_2} \|\mathbf{T} \circ \widehat{\mathbf{W}} \circ \boldsymbol{\epsilon}\| \leq C_7 \max \left\{ \sqrt{\frac{\tau^2 \pi \log(n_1 + n_2)}{(n_1 \wedge n_2) n_1 n_2}}, \tau \log(1/\sqrt{\pi}) \frac{\log^{3/2}(n_1 + n_2)}{n_1 n_2} \right\}.$$

Overall, the conclusion follows. □

## D. Useful Results

**Theorem S2** (Theorem 4.4.5 of [Vershynin \(2018\)](#)). *Let  $\mathbf{A}$  be an  $n_1 \times n_2$  random matrix whose entries  $A_{ij}$  are independent, mean zero, sub-gaussian random variables. Then, for any  $t > 0$  we have*

$$\|\mathbf{A}\| \leq CK(\sqrt{n_1} + \sqrt{n_2} + t)$$

with probability at least  $1 - 2 \exp(-t^2)$ . Here  $K = \max_{i,j} \|A_{ij}\|_{\psi_2}$  and  $C$  is an absolute constant.

*Proof.* The proof can be found on Page 91 in [Vershynin \(2018\)](#). □

**Theorem S3** (Proposition 1 of [Koltchinskii et al. \(2011\)](#)). *Let  $\mathbf{Z}_1, \dots, \mathbf{Z}_N$  be independent random matrices with dimensions  $n_1 \times n_2$  that satisfy  $\mathbf{E}\mathbf{Z}_i = \mathbf{0}$  and  $\|\mathbf{Z}_i\| \leq U$  almost surely for some constant  $U$  and all  $i = 1, \dots, N$ . Define*

$$\sigma_Z = \max \left\{ \left\| \frac{1}{N} \sum_{i=1}^N \mathbf{E}(\mathbf{Z}_i \mathbf{Z}_i^\top) \right\|^{1/2}, \left\| \frac{1}{N} \sum_{i=1}^N \mathbf{E}(\mathbf{Z}_i^\top \mathbf{Z}_i) \right\|^{1/2} \right\}.$$

Then, for all  $t > 0$ , with probability at least  $1 - \exp(-t)$  we have

$$\left\| \frac{\mathbf{Z}_1 + \dots + \mathbf{Z}_N}{N} \right\| \leq 2 \max \left\{ \sigma_Z \sqrt{\frac{t + \log(n_1 + n_2)}{N}}, U \frac{t + \log(n_1 + n_2)}{N} \right\},$$

*Proof.* The proof can be found on Page 2325 in [Koltchinskii et al. \(2011\)](#). □



## E. Algorithm

### E.1. Convex Algorithm for Solving (7)

Follow Fang et al. (2018) and Cai & Zhou (2016), we consider an equivalent form objective function in (7) below.

$$\min_{\mathbf{X}, \mathbf{Z}} \frac{1}{n_1 n_2} \|\mathbf{T} \circ \widehat{\mathbf{W}}^{\circ(1/2)} \circ (\mathbf{Y} - \mathbf{Z}_{12})\|_F^2 + \mu \langle \mathbf{I}, \mathbf{X} \rangle,$$

Subject to  $\mathbf{X} \succcurlyeq 0$ ,  $\mathbf{X} = \mathbf{Z}$ ,  $\mathbf{Z} \in \mathcal{P}_\beta$

where  $\mathbf{Z}, \mathbf{X} \in \mathbb{R}^{(n_1+n_2) \times (n_1+n_2)}$ ,  $\mathcal{S}$  is the class of all symmetric matrices in  $\mathbb{R}^{(n_1+n_2) \times (n_1+n_2)}$ ,  $\mathcal{P}_\beta := \{\mathbf{C} \in \mathcal{S} : \text{diag}(\mathbf{C}) \geq 0, \|\mathbf{C}\|_\infty \leq \beta\}$ ,  $\mathbf{I}$  is an identity matrix and

$$\mathbf{Z} = \begin{bmatrix} \mathbf{Z}_{11} & \mathbf{Z}_{12} \\ \mathbf{Z}_{12}^\top & \mathbf{Z}_{22} \end{bmatrix}, \mathbf{Z}_{11} \in \mathbb{R}^{n_1 \times n_1}, \mathbf{Z}_{22} \in \mathbb{R}^{n_2 \times n_2}$$

The derivation of above representation mainly comes from two facts: 1. The nuclear norm of  $\mathbf{Z}_{12}$  is the the smallest possible sum of elements on the diagonal of  $\mathbf{Z}$  given  $\mathbf{Z} \succcurlyeq 0$  (Fazel et al., 2001); 2. The max norm of matrix  $\mathbf{Z}_{12}$  is the smallest possible maximum element on the diagonal of  $\mathbf{Z}$  given  $\mathbf{Z} \succcurlyeq 0$  (Srebro et al., 2005).

The augmented Lagrangian function can be written as

$$\mathcal{L}(\mathbf{X}, \mathbf{Z}, \mathbf{V}) = \frac{1}{n_1 n_2} \|\mathbf{T} \circ \widehat{\mathbf{W}}^{\circ(1/2)} \circ (\mathbf{Y} - \mathbf{Z}_{12})\|_F^2 + \mu \langle \mathbf{I}, \mathbf{X} \rangle + \langle \mathbf{V}, \mathbf{X} - \mathbf{Z} \rangle + \frac{\rho}{2} \|\mathbf{X} - \mathbf{Z}\|_F^2,$$

Subject  $\mathbf{X} \succcurlyeq 0$ ,  $\mathbf{Z} \in \mathcal{P}_\beta$ ,

where  $\mathbf{V} \in \mathbb{R}^{(n_1+n_2) \times (n_1+n_2)}$  is the dual variable and  $\rho > 0$  is a hyper-parameter.

Then the alternating direction method of multipliers (ADMM) algorithm solves this optimization problem by minimizing the augmented Lagrangian with respect to different variables alternately. More explicitly, at the  $(t+1)$ -th iteration, the following updates are implemented:

$$\begin{aligned} \mathbf{X}^{t+1} &= \Pi\{\mathbf{Z}^t + \rho^{-1}(\mathbf{V}^t + \mu \mathbf{I})\}, \\ \mathbf{Z}^{(t+1)} &= \arg \min_{\mathbf{Z} \in \mathcal{P}_\beta} \frac{1}{n_1 n_2} \|\mathbf{T} \circ \widehat{\mathbf{W}}^{\circ(1/2)} \circ (\mathbf{Y} - \mathbf{Z}_{12})\|_F^2 + \frac{\rho}{2} \|\mathbf{Z} - \mathbf{X}^{t+1} - \rho^{-1} \mathbf{V}^t\|_F^2 = \Phi_{\mathbf{T}, \mathbf{Y}, \widehat{\mathbf{W}}, \beta}\{\mathbf{X}^{t+1} + \rho^{-1} \mathbf{V}^t\}, \\ \mathbf{V}^{t+1} &= \mathbf{V}^t + \tau \rho (\mathbf{X}^{t+1} - \mathbf{Z}^{t+1}), \end{aligned}$$

where  $\Pi(\cdot)$  is the projection to the space  $\{\mathbf{C} \in \mathcal{S} : \mathbf{C} \succcurlyeq 0\}$ , and  $\Phi_{\mathbf{T}, \mathbf{Y}, \widehat{\mathbf{W}}, \beta}$  is defined in Definition S1. Detailed derivation can be found in Fang et al. (2018) and Cai & Zhou (2016).

**Definition S1.** We use  $C(i, j)$  to represent the element on the  $i$ -th row and  $j$ -th column of a matrix  $\mathbf{C}$ . For the matrix  $\mathbf{C} \in \mathbb{R}^{(n_1+n_2) \times (n_1+n_2)}$ , it can be partitioned into

$$\mathbf{C} = \begin{bmatrix} \mathbf{C}_{11} & \mathbf{C}_{12} \\ \mathbf{C}_{12}^\top & \mathbf{C}_{22} \end{bmatrix}, \mathbf{C}_{11} \in \mathbb{R}^{n_1 \times n_1}, \mathbf{C}_{22} \in \mathbb{R}^{n_2 \times n_2}$$

Then

$$\Phi_{\mathbf{T}, \mathbf{Y}, \widehat{\mathbf{W}}, \beta}(\mathbf{C}) = \begin{bmatrix} \Phi_{\mathbf{T}, \mathbf{Y}, \widehat{\mathbf{W}}, \beta}(\mathbf{C})_{11} & \Phi_{\mathbf{T}, \mathbf{Y}, \widehat{\mathbf{W}}, \beta}(\mathbf{C})_{12} \\ \Phi_{\mathbf{T}, \mathbf{Y}, \widehat{\mathbf{W}}, \beta}(\mathbf{C})_{12}^\top & \Phi_{\mathbf{T}, \mathbf{Y}, \widehat{\mathbf{W}}, \beta}(\mathbf{C})_{22} \end{bmatrix},$$

where

$$\begin{aligned}
 \Phi_{\mathbf{T}, \mathbf{Y}, \widehat{\mathbf{W}}, \beta}(\mathbf{C})_{11}(i, j) &= \min\{\beta, \max\{\mathbf{C}_{11}(i, j), -\beta\}\} & \text{if } i \neq j, \\
 \Phi_{\mathbf{T}, \mathbf{Y}, \widehat{\mathbf{W}}, \beta}(\mathbf{C})_{11}(i, j) &= \min\{\beta, \max\{\mathbf{C}_{11}(i, j), 0\}\} & \text{if } i = j, \\
 \Phi_{\mathbf{T}, \mathbf{Y}, \widehat{\mathbf{W}}, \beta}(\mathbf{C})_{22}(i, j) &= \min\{\beta, \max\{\mathbf{C}_{22}(i, j), -\beta\}\}, & \text{if } i \neq j, \\
 \Phi_{\mathbf{T}, \mathbf{Y}, \widehat{\mathbf{W}}, \beta}(\mathbf{C})_{22}(i, j) &= \min\{\beta, \max\{\mathbf{C}_{22}(i, j), 0\}\} & \text{if } i = j, \\
 \Phi_{\mathbf{T}, \mathbf{Y}, \widehat{\mathbf{W}}, \beta}(\mathbf{C})_{12}(i, j) &= \min\left\{\beta, \max\left\{\frac{\mathbf{Y}(i, j)\widehat{\mathbf{W}}(i, j) + \rho\mathbf{C}(i, j)}{\widehat{\mathbf{W}}(i, j) + \rho}, -\beta\right\}\right\} & \text{if } \mathbf{T}(i, j) = 1, \\
 \Phi_{\mathbf{T}, \mathbf{Y}, \widehat{\mathbf{W}}, \beta}(\mathbf{C})_{12}(i, j) &= \min\{\beta, \max\{\mathbf{C}_{12}(i, j), -\beta\}\} & \text{if } i \neq j \quad \text{if } \mathbf{T}(i, j) = 0.
 \end{aligned}$$

We summarize the algorithm in Algorithm 1. Some piratical implementations to adaptively tune  $\rho$  and accelerate the computation can be found in Section 3.3 and 3.4 in Fang et al. (2018).

---

**Algorithm 1** ADMM algorithm
 

---

**Input:**  $\mathbf{Y}, \mathbf{T}, \beta, \mu, \widehat{\mathbf{W}}, \rho = 0.1, \tau = 1.618, K$   
 Initialize  $\mathbf{X}^0, \mathbf{Z}^0, \mathbf{V}^0, R$   
**for**  $t = 1$  **to**  $K - 1$  **do**  
      $\mathbf{X}^{t+1} \leftarrow \Pi\{\mathbf{Z}^t + \rho^{-1}(\mathbf{V}^t + \mu\mathbf{I})\}$   
      $\mathbf{Z}^{(t+1)} \leftarrow \Phi_{\mathbf{T}, \mathbf{Y}, \widehat{\mathbf{W}}, \beta}\{\mathbf{X}^{t+1} + \rho^{-1}\mathbf{V}^t\}$   
      $\mathbf{V}^{t+1} \leftarrow \mathbf{V}^t + \tau\rho(\mathbf{X}^{t+1} - \mathbf{Z}^{t+1})$   
     Stop if objective value changes less than tolerance  
**end for**

---

## E.2. Nonconvex Algorithm for Solving (7)

The nonconvex algorithm for max-norm regularization developed in Lee et al. (2010) base on the equivalent definition of max-norm via matrix factorizations:

$$\|\mathbf{C}\|_{\max} := \inf\{\|\mathbf{U}\|_{2, \infty}\|\mathbf{V}\|_{2, \infty} : \mathbf{C} = \mathbf{UV}^\top\},$$

where  $\|\cdot\|_{2, \infty}$  denotes the maximum  $l_2$  row norm of a matrix.

To incorporate the nuclear norm regularization, we also notice an equivalent definition of the nuclear norm:

$$\|\mathbf{C}\|_* := \inf \frac{1}{2} \{\|\mathbf{U}\|_F^2 + \|\mathbf{V}\|_F^2 : \mathbf{C} = \mathbf{UV}^\top\}.$$

Then we have the following relaxation of the objective function in (7). Take

$$f(\mathbf{L}, \mathbf{R}) = \frac{1}{n_1 n_2} \|\mathbf{T} \circ \widehat{\mathbf{W}}^{\circ(1/2)} \circ (\mathbf{Y} - \mathbf{LR}^\top)\|_F^2 + \frac{\mu}{2} (\|\mathbf{L}\|_F^2 + \|\mathbf{R}\|_F^2),$$

and we obtain

$$\begin{aligned}
 &\min_{\mathbf{L}, \mathbf{R}} f(\mathbf{L}, \mathbf{R}), \\
 &\text{Subject to } \max\{\|\mathbf{L}\|_{2, \infty}, \|\mathbf{R}\|_{2, \infty}\} \leq \beta.
 \end{aligned}$$

This optimization form is exactly the one in Lee et al. (2010) except that we add another nuclear penalty in the objective function  $f$ .

Like what Lee et al. (2010) considered, the projected gradient descent method can be applied to iteratively solve this problem. We define the project  $\mathcal{P}_B$  as the Euclidean projection onto the set  $\{\mathbf{M} : \|\mathbf{M}\|_{2, \infty} \leq B\}$ . This projection can be computed by re-scaling the rows of current input matrix whose norms exceed  $B$  so their norms equal  $B$ . Rows with norms less than  $B$  are unchanged by the projection. We summarize the algorithm in Algorithm 2.

**Algorithm 2** Projected gradient descent algorithm

**Input:**  $Y, T, \beta, \mu, \widehat{W}$ , step size  $\tau, K$   
 Initialize  $L^0, R^0$ ,  
**for**  $t = 1$  **to**  $K - 1$  **do**  
      $L^{t+1} \leftarrow \mathcal{P}_\beta \left( L - \tau \frac{\partial f}{\partial L} \right)$   
      $R^{t+1} \leftarrow \mathcal{P}_\beta \left( R - \tau \frac{\partial f}{\partial R} \right)$   
     Stop if objective value changes less than tolerance  
**end for**

## F. Additional Simulation Results

The simulation results for SNR = 1 and SNR = 10 are shown in Table S1 and S2 respectively.

Table S1. Similar to Table 1, but for SNR = 1.

| Method     | Setting 1           |                     |               |
|------------|---------------------|---------------------|---------------|
|            | RMSE                | TE                  | $\bar{r}$     |
| Proposed   | <b>1.901(0.004)</b> | <b>1.918(0.004)</b> | 13.69(0.097)  |
| SoftImpute | 1.944(0.004)        | 1.961(0.004)        | 19.55(0.092)  |
| CZ         | 2.052(0.004)        | 2.044(0.004)        | 27.695(0.128) |
| FLT        | <b>1.927(0.004)</b> | <b>1.946(0.004)</b> | 15.265(0.105) |
| NW         | 2.012(0.004)        | 2.01(0.004)         | 25.61(0.069)  |
| KLT        | 2.439(0.005)        | 2.492(0.005)        | 10.175(0.063) |
| Method     | Setting 2           |                     |               |
| Proposed   | <b>1.716(0.004)</b> | <b>1.669(0.004)</b> | 14.73(0.113)  |
| SoftImpute | 1.721(0.004)        | 1.685(0.004)        | 16.335(0.107) |
| CZ         | 1.86(0.004)         | 1.799(0.004)        | 25.965(0.115) |
| FLT        | <b>1.711(0.004)</b> | <b>1.674(0.004)</b> | 14.565(0.102) |
| NW         | 1.805(0.005)        | 1.747(0.005)        | 37.82(0.422)  |
| KLT        | 2.16(0.005)         | 2.093(0.005)        | 2.065(0.110)  |
| Method     | Setting 3           |                     |               |
| Proposed   | <b>2.412(0.006)</b> | <b>2.586(0.007)</b> | 12.495(0.098) |
| SoftImpute | 2.923(0.007)        | 3.113(0.007)        | 29.15(0.112)  |
| CZ         | 2.641(0.006)        | 2.812(0.006)        | 28.695(0.109) |
| FLT        | 2.878(0.007)        | 3.097(0.007)        | 20.105(0.105) |
| NW         | <b>2.668(0.006)</b> | <b>2.779(0.007)</b> | 33.115(0.066) |
| KLT        | 3.667(0.007)        | 3.969(0.007)        | 9.765(0.067)  |

## G. Code

The code for implementing the proposed method can be found in <https://github.com/jiayiwang1017/MC-weighting-code>.

## References

- Banerjee, A., Chen, S., Fazayeli, F., and Sivakumar, V. Estimation with norm regularization. In *Advances in Neural Information Processing Systems*, pp. 1556–1564, 2014.
- Cai, T. T. and Zhou, W.-X. Matrix completion via max-norm constrained optimization. *Electronic Journal of Statistics*, 10(1):1493–1525, 2016.
- Fang, E. X., Liu, H., Toh, K.-C., and Zhou, W.-X. Max-norm optimization for robust matrix recovery. *Mathematical Programming*, 167(1):5–35, 2018.

Table S2. Similar to Table 1, but for SNR = 10.

| Method     | Setting 1                |                        |                |
|------------|--------------------------|------------------------|----------------|
|            | $\overline{\text{RMSE}}$ | $\overline{\text{TE}}$ | $\bar{r}$      |
| Proposed   | <b>0.425(0.001)</b>      | <b>0.443(0.001)</b>    | 30.565(0.143)  |
| SoftImpute | 0.483(0.001)             | 0.501(0.001)           | 91.615(1.845)  |
| CZ         | 0.663(0.001)             | 0.688(0.001)           | 54.225(0.178)  |
| FLT        | 0.427(0.001)             | 0.446(0.001)           | 32.105(0.129)  |
| NW         | <b>0.405(0.001)</b>      | <b>0.422(0.001)</b>    | 30.180(0.196)  |
| KLT        | 1.894(0.003)             | 1.958(0.003)           | 8.665(0.059)   |
| Method     | Setting 2                |                        |                |
|            | $\overline{\text{RMSE}}$ | $\overline{\text{TE}}$ | $\bar{r}$      |
| Proposed   | <b>0.401(0.001)</b>      | <b>0.418(0.001)</b>    | 29.360(0.136)  |
| SoftImpute | 0.475(0.001)             | 0.484(0.001)           | 120.670(3.387) |
| CZ         | 0.684(0.002)             | 0.722(0.002)           | 59.300(0.485)  |
| FLT        | <b>0.409(0.001)</b>      | <b>0.426(0.001)</b>    | 30.380(0.145)  |
| NW         | 0.496(0.003)             | 0.510(0.003)           | 19.055(0.368)  |
| KLT        | 1.975(0.006)             | 1.873(0.004)           | 1.375(0.144)   |
| Method     | Setting 3                |                        |                |
|            | $\overline{\text{RMSE}}$ | $\overline{\text{TE}}$ | $\bar{r}$      |
| Proposed   | <b>0.627(0.001)</b>      | <b>0.688(0.002)</b>    | 32.675(0.144)  |
| SoftImpute | 0.868(0.002)             | 0.966(0.003)           | 77.115(1.343)  |
| CZ         | 0.999(0.003)             | 1.105(0.004)           | 56.890(0.152)  |
| FLT        | <b>0.670(0.002)</b>      | <b>0.736(0.002)</b>    | 39.740(0.820)  |
| NW         | 0.703(0.003)             | 0.768(0.003)           | 21.860(0.614)  |
| KLT        | 3.157(0.006)             | 3.460(0.006)           | 9.535(0.088)   |

Fazel, M., Hindi, H., and Boyd, S. P. A rank minimization heuristic with application to minimum order system approximation. In *Proceedings of the 2001 American Control Conference.(Cat. No. 01CH37148)*, volume 6, pp. 4734–4739. IEEE, 2001.

Golub, G. H. and Van Loan, C. F. *Matrix computations*. Johns Hopkins studies in the mathematical sciences, 1996.

Jalali, A. and Srebro, N. Clustering using max-norm constrained optimization. In *Proceedings of the 29th International Conference on Machine Learning (ICML-12)*, pp. 481–488, 2012.

Klopp, O. Noisy low-rank matrix completion with general sampling distribution. *Bernoulli*, 20(1):282–303, 2014.

Koltchinskii, V. *Oracle Inequalities in Empirical Risk Minimization and Sparse Recovery Problems*. Springer, 2011.

Koltchinskii, V., Lounici, K., and Tsybakov, A. B. Nuclear-norm penalization and optimal rates for noisy low-rank matrix completion. *The Annals of Statistics*, 39(5):2302–2329, 2011.

Kontorovich, A. Concentration in unbounded metric spaces and algorithmic stability. In *International Conference on Machine Learning*, pp. 28–36, 2014.

Lee, J. D., Recht, B., Srebro, N., Tropp, J., and Salakhutdinov, R. R. Practical large-scale optimization for max-norm regularization. In *Advances in neural information processing systems*, pp. 1297–1305, 2010.

Lee, T., Shraibman, A., and Špalek, R. A direct product theorem for discrepancy. In *2008 23rd Annual IEEE Conference on Computational Complexity*, pp. 71–80. IEEE, 2008.

Srebro, N. and Shraibman, A. Rank, trace-norm and max-norm. In *International Conference on Computational Learning Theory*, pp. 545–560. Springer, 2005.

Srebro, N., Rennie, J., and Jaakkola, T. S. Maximum-margin matrix factorization. In *Advances in neural information processing systems*, pp. 1329–1336, 2005.

Talagrand, M. *The generic chaining: upper and lower bounds of stochastic processes*. Springer Science & Business Media, 2006.

Tsybakov, A. B. *Introduction to Nonparametric Estimation*. Springer-Verlag New York, New York, 2009.

Vershynin, R. *High-dimensional probability: An introduction with applications in data science*, volume 47. Cambridge university press, 2018.
